# Supplementary material for: Sunlight-driven and gram-scale vanillin production via Mn-defected γ-MnO2 catalyst in aqueous environment
Source: Royal Society of Chemistry journal article supplement (doi:10.1039/d3sc05654f), 2024-01-01
Supplement: d3sc05654f1.pdf [file d3sc05654f1.pdf]

## 1. Supporting experimental details

### 1.1 Materials

KMnO<sub>4</sub> (99.5%, AR), MnSO<sub>4</sub>•H<sub>2</sub>O (99%, AR), (NH<sub>4</sub>)<sub>2</sub>S<sub>2</sub>O<sub>8</sub> (98%, AR), vanillin alcohol (98%), urea (99%, AR), and NaHCO<sub>3</sub> (99.5%, AR) were purchased from Shanghai Aladdin Biochemical Technology Co., Ltd (China). Ultrapure water (18.2 MΩ·cm<sup>-1</sup>) was produced by a HOKEE purification system (HOKEE-A1-10, China). Other commercially available reagents, such as alcohols and metal salts, were purchased from TCI (Japan) and used without further purification.

### 1.2 Synthesis of $\gamma$ -MnO<sub>2</sub>

Typically, 1.93 g of MnSO<sub>4</sub>•H<sub>2</sub>O and 1.83 g of (NH<sub>4</sub>)<sub>2</sub>S<sub>2</sub>O<sub>8</sub> were dissolved in 30 mL of ultrapure water under vigorous stirring at room temperature for 30 min. Subsequently, x mmol of urea (x= 0, 1, and 10 mmol) was added and stirred for an additional 30 min to form the MnO<sub>2</sub> precursor solution. The MnO<sub>2</sub> precursor solution was then hydrothermally treated at 90 °C for 24 h. The resulting mixture was filtered, washed three times with ethanol and water alternately, and dried completely at 80 °C for 12 h to obtain 0.8~1 g of a black powder. The black powder is named  $\gamma$ -MnO<sub>2</sub>(x) according to the supplied amount of urea (x), and the one without urea is named  $\gamma$ -MnO<sub>2</sub>. The production cost of the prepared  $\gamma$ -MnO<sub>2</sub> catalyst is estimated at £ 29.6/kg, based on the purchase cost of raw materials and energy usage.

### 1.3 Synthesis of $\alpha$ -MnO<sub>2</sub>.

Typically, 1.26 g of KMnO<sub>4</sub> and 0.72 g of MnSO<sub>4</sub>•H<sub>2</sub>O were dissolved in 80mL of ultrapure water under vigorous stirring at room temperature for 30 min. Subsequently, x mmol of urea (x= 0, 1, and 10 mmol) was added and stirred for an additional 30 min to form the MnO<sub>2</sub> precursor solution. The MnO<sub>2</sub> precursor solution was then hydrothermally treated at 160 °C for 12 h. The obtained mixture was filtered, washed three times with ethanol and water alternately, and dried completely at 80 °C for 12 h. The product was calcined at 300 °C for 4 h to yield a brown powder. The brown powder is named  $\alpha$ -MnO<sub>2</sub>(x) according to the amount of urea added (x), and  $\alpha$ -MnO<sub>2</sub> without urea.

#### 1.4 Synthesis of $\beta$ -MnO<sub>2</sub>

Typically, 0.632 g of KMnO<sub>4</sub> and 2.89g MnSO<sub>4</sub>•H<sub>2</sub>O were dissolved in 80mL of ultrapure water under vigorous stirring at room temperature for 30 min. The MnO<sub>2</sub> precursors were hydrothermally treated at 160 °C for 12 h. The obtained mixture was filtered, washed two or three times with ethanol and water alternately, and then dried at 80 °C for 12 h. The product was calcined at 300 °C for 4h to yield a black powder. The black powder is named  $\beta$ -MnO<sub>2</sub>.

#### 1.5 Synthesis of $\epsilon$ -MnO<sub>2</sub>

Typically, 0.169 g of MnSO<sub>4</sub>•H<sub>2</sub>O was dissolved in a mixture of ultrapure water (70 mL) and anhydrous ethanol (7 mL) under vigorous stirring at room temperature. Then 0.84 g NaHCO<sub>3</sub> was dissolved in it, stirred for about 10 min, and allowed to stand at room temperature for 3 h. The obtained mixture was filtered, washed two or three times with ethanol and water alternately, and then dried at 80°C for 12 h. The product was calcined at 400°C for 6 h to yield a black powder. The black powder is named  $\epsilon$ -MnO<sub>2</sub>.

#### 1.6 Catalytic test

In a 10 mL quartz reactor, a mixture of 10 mmol of catalyst, 6 mL of ultrapure water, and 0.77 g of vanillyl alcohol was added. The reactor was operated under an air atmosphere at a temperature of 30 °C, with the reaction temperature controlled using a cycle pump.

The catalytic performance was analyzed using a PANNA A91Plus Gas chromatography (GC) system from China, equipped with a capillary column (HP-5 column, 30 m × 0.32 mm, 0.50  $\mu$ m film thicknesses). Normalization of the obtained results was carried out using the following equations:

$$\text{Alcohol conversion (Con.)} = \frac{S_{AL} + S_{Others}}{S_{AL} + S_{OL} + S_{Others}} \times 100\% \quad (1)$$

$$\text{Aldehyde selectivity (Sel.)} = \frac{S_{AL}}{S_{AL} + S_{Others}} \times 100\% \quad (2)$$

where  $S_{AL}$ ,  $S_{OL}$ , and  $S_{Others}$  refer to the areas of aldehyde, alcohol, and other products in GC, respectively.

## 1.7 Radical Scavenger Experiments

In a 10 mL quartz reactor, a mixture consisting of 100 mg of catalyst, 2 mL of ultrapure water, 1 mmol of alcohol, and 1 mmol of scavenger (FFA, mannitol, or *p*-BQ) was prepared. The reactor was performed under an air atmosphere at a temperature of 30 °C, with the reaction temperature regulated using a cycle pump.

## 1.8 Computational Details

The present spin-polarized first principle DFT calculations were performed using Vienna Ab initio Simulation Package (VASP)<sup>1</sup> with the projector augmented wave (PAW) method.<sup>2</sup> The exchange-functional was treated using the generalized gradient approximation (GGA) of Perdew-Burke-Ernzerhof (PBE)<sup>3</sup> functional. The energy cutoff for the plane wave basis expansion was set to 450 eV, and the force on each atom less than 0.02 eV/Å was set as the convergence criterion for geometry relaxation. To avoid interaction between periodic structures, a 15 Å vacuum was added along the Z direction. The Brillouin zone integration was performed using 3×3×1 k-point sampling. The self-consistent calculations employed a convergence energy threshold of 10<sup>-5</sup> eV. The DFT-D3 method was employed to consider the van der Waals interaction.<sup>4</sup> DFT+U was employed to account for the strong on-site Coulomb repulsion among the localized Mn 3d electrons, using a  $Mn_{3d}$  U value of 2.8 eV and a J value of 1.2 eV for Mn ions.<sup>5</sup>

The adsorption energy  $E_{ads}$  was calculated according to:

$$E_{ads} = E_{tot} - E_{mol} - E_{sub}$$

where  $E_{tot}$  is the total energy of the adsorbed system, and  $E_{mol}$  and  $E_{sub}$  are the energies of the adsorbed molecule and the substrate, respectively.

## 1.9 Characterizations

Powder X-ray diffraction (PXRD) spectra were collected on a Smartlab X-ray Polycrystalline Diffraction Analyzer (Rigaku, Japan). Scanning Electron Microscope (SEM) and Transmission Electron Microscope (TEM) images were obtained using JSM-6490LV (JSM, Japan) and Talos F200X microscopes (FEI, USA), respectively. X-

ray photoelectron spectroscopy (XPS) spectra were collected using a PHI-5000C ESCA system (Perkin-Elmer, USA) with Al K $\alpha$  radiation ( $h\nu=1486.6$  eV). Ultraviolet-Visible-Near Infrared diffuse reflectance spectroscopy (UV-Vis-NIR DRS) was recorded using a UV-3600plus Spectrometer (Shimadzu, Japan). Electron paramagnetic resonance (EPR) spectra were collected on an EMXPLUS (Bruker, Germany). The EPR analysis was conducted by the addition of 5,5-dimethyl-1-pyrroline N-oxide (DMPO) as a trap for  $\cdot\text{OH}$  and  $\text{O}_2^{\cdot-}$  species. For  $\text{O}_2^{\cdot-}$  species measurement, 5 mg of powder was dispersed in 5 mL of methanol. After ultrasonication for 5 min, 200  $\mu\text{L}$  of the mixed solution was taken and mixed with 200  $\mu\text{L}$  of DMPO solution with a concentration of 100 mM. The mixture was then placed into a capillary tube and tested in the machine at room temperature. Fourier-transform infrared (FT-IR) spectra were recorded on a Nicolet IS50 Fourier Transform Infrared Spectrometer (Thermo Fisher, USA). All *in-situ* diffuse reflectance IR spectra (DRIFTS) were recorded on a Nicolet IS50 FT-IR spectrometer equipped with a DRIFTS cell (OPERANDO-TETRA) and MCT detector.  $\text{N}_2$  and  $\text{O}_2$  were purged into the cell with a flow rate of  $\sim 10$   $\text{mL}\cdot\text{min}^{-1}$  with the catalyst as the background. Water was introduced into the DRIFTS cell *via* the  $\text{O}_2$  stream. The catalyst powder was pre-treated in pure  $\text{N}_2$  at 30  $^\circ\text{C}$  for 30 min before collecting the background.

## 2. Supplementary results

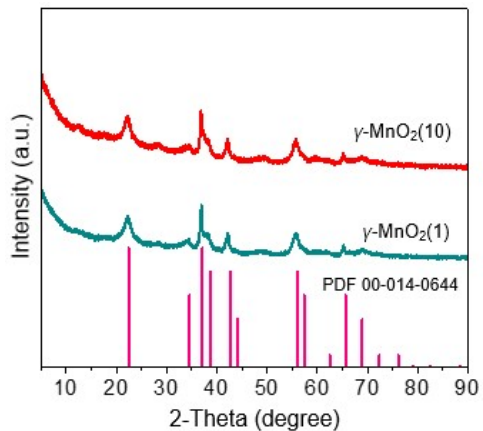

**Fig. S1.** PXRD patterns of  $\gamma\text{-MnO}_2(1)$  and  $\gamma\text{-MnO}_2(10)$  particles.

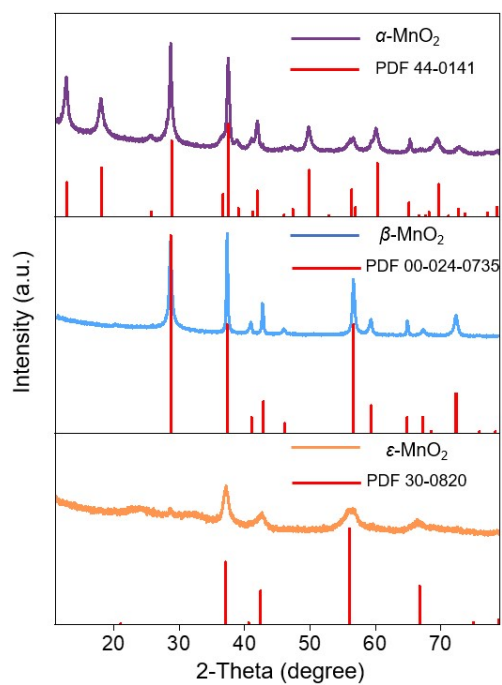

**Fig. S2.** PXRD patterns of  $\alpha\text{-MnO}_2$ ,  $\beta\text{-MnO}_2$ , and  $\epsilon\text{-MnO}_2$  particles.

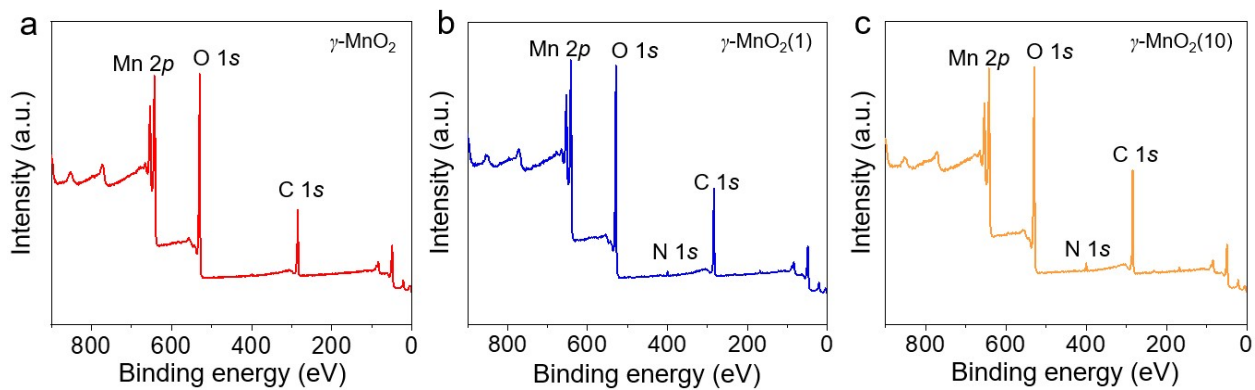

**Fig. S3.** XPS patterns of (a)  $\gamma$ -MnO<sub>2</sub>, (b)  $\gamma$ -MnO<sub>2</sub>(1), and (c)  $\gamma$ -MnO<sub>2</sub>(10) oxides.

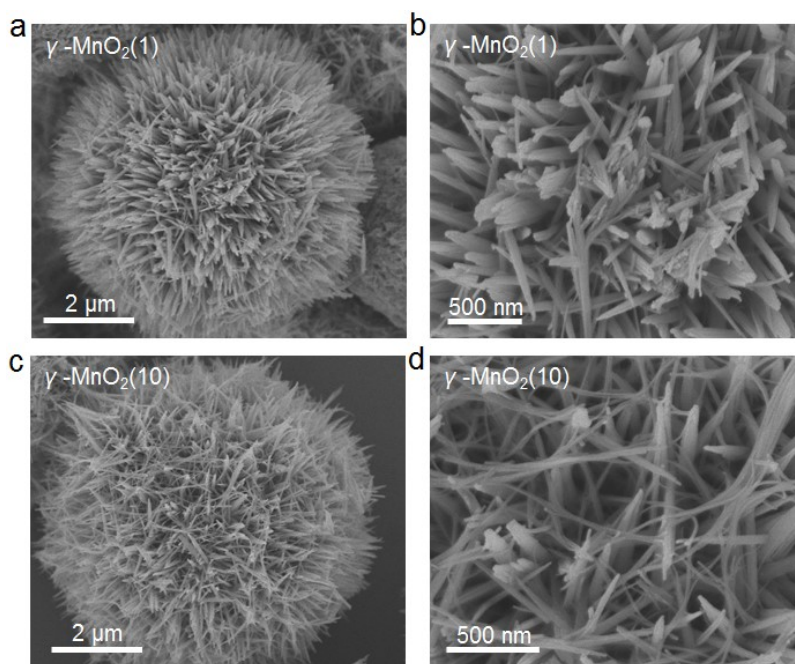

**Fig. S4.** SEM images of the synthesized (a, b)  $\gamma$ -MnO<sub>2</sub>(1) and (c, d)  $\gamma$ -MnO<sub>2</sub>(10) particles.

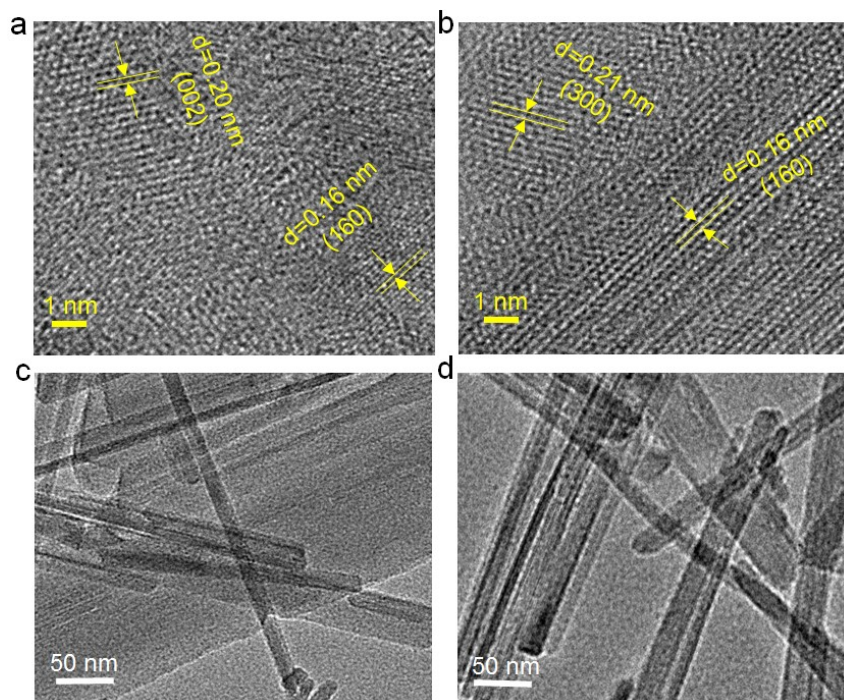

**Fig. S5.** (a, b) HRTEM and (c, d) TEM images of the synthesized (a, c)  $\gamma$ - $\text{MnO}_2(1)$  and (b, d)  $\gamma$ - $\text{MnO}_2(10)$  oxides.

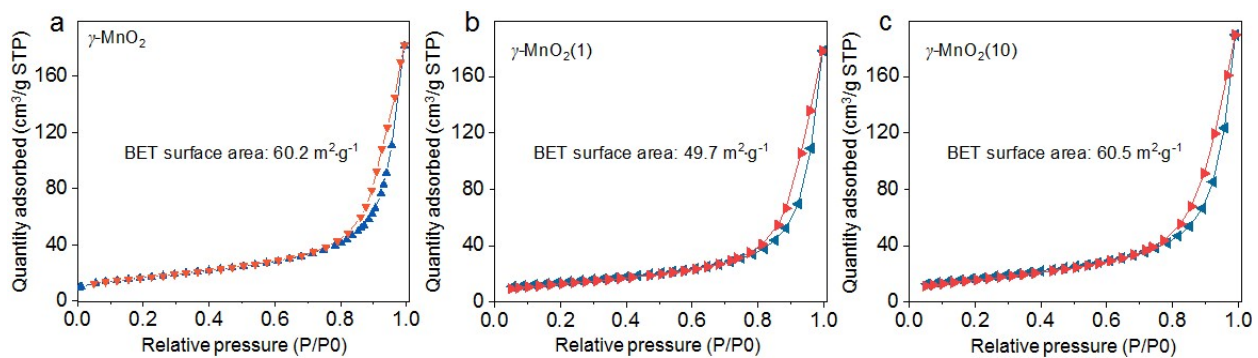

**Fig. S6.**  $\text{N}_2$  adsorption-desorption isotherms of  $\gamma$ - $\text{MnO}_2$ ,  $\gamma$ - $\text{MnO}_2(1)$ , and  $\gamma$ - $\text{MnO}_2(10)$  oxides.

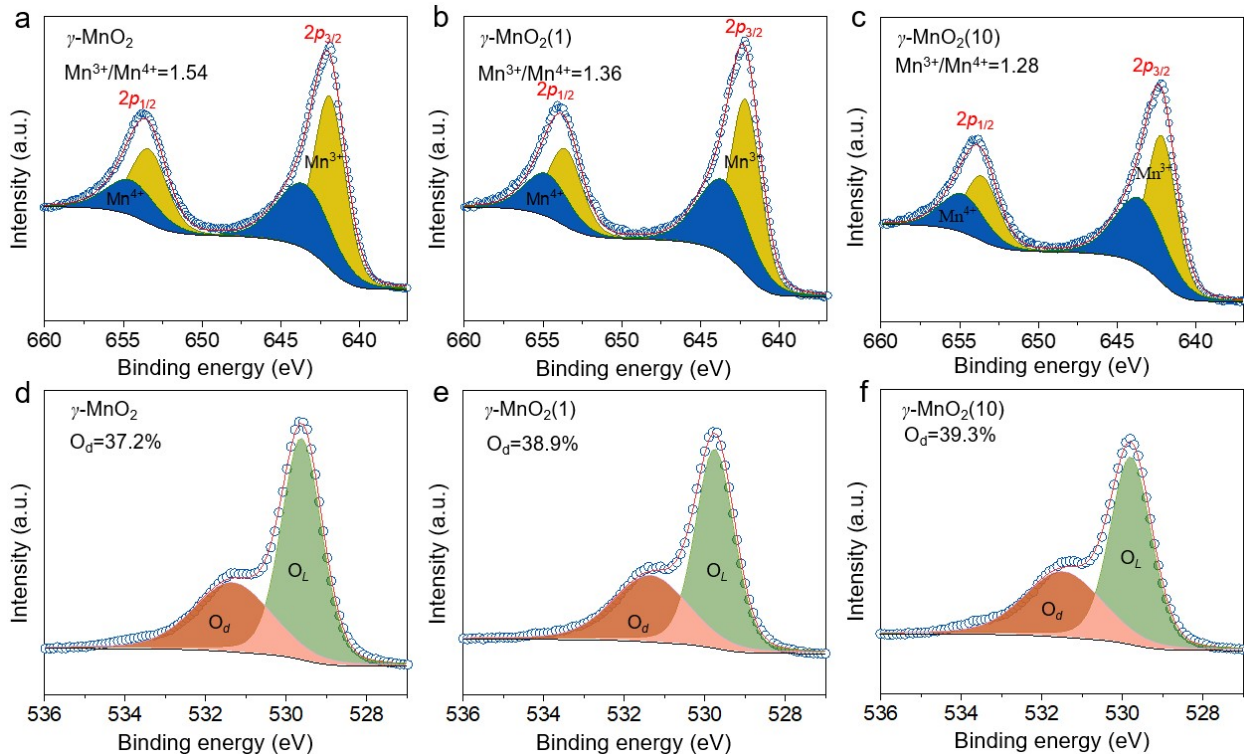

**Fig. S7.** Mn 2p and O 1s XPS patterns of (a, d)  $\gamma$ -MnO<sub>2</sub>, (b, e)  $\gamma$ -MnO<sub>2</sub>(1), and (c, f)  $\gamma$ -MnO<sub>2</sub>(10) oxides.

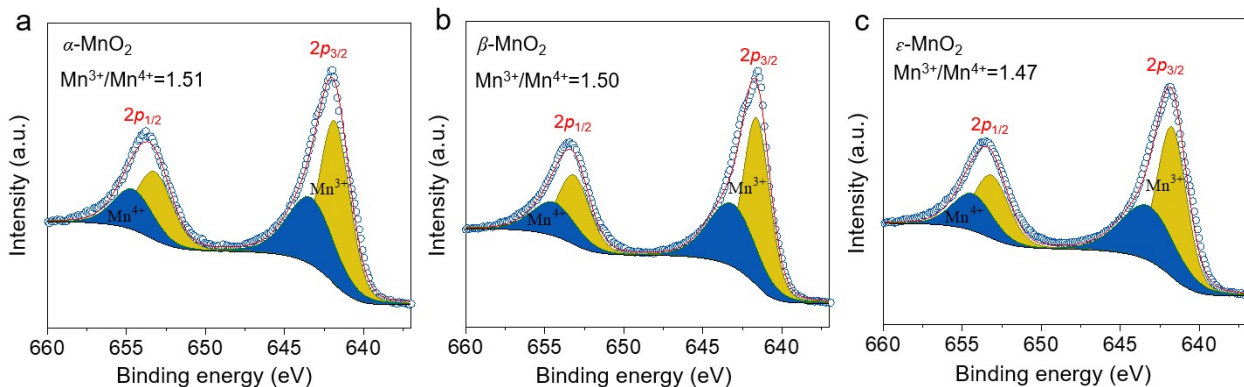

**Fig. S8.** Mn 2p XPS spectra of (a)  $\alpha$ -MnO<sub>2</sub>, (b)  $\beta$ -MnO<sub>2</sub>, and (c)  $\epsilon$ -MnO<sub>2</sub> oxides.



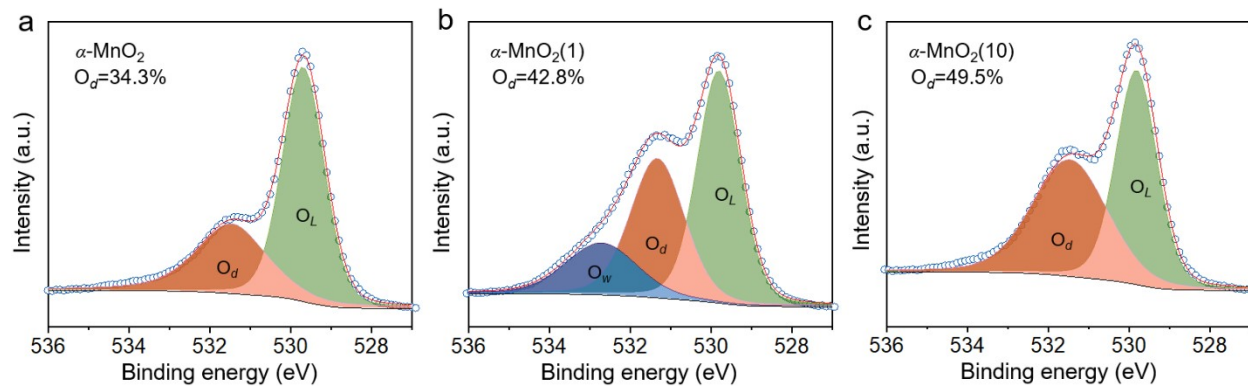

**Fig. S9.** O 2p XPS spectra of (a)  $\alpha$ -MnO<sub>2</sub>, (b)  $\alpha$ -MnO<sub>2</sub>(1), and (c)  $\alpha$ -MnO<sub>2</sub>(10) oxides.

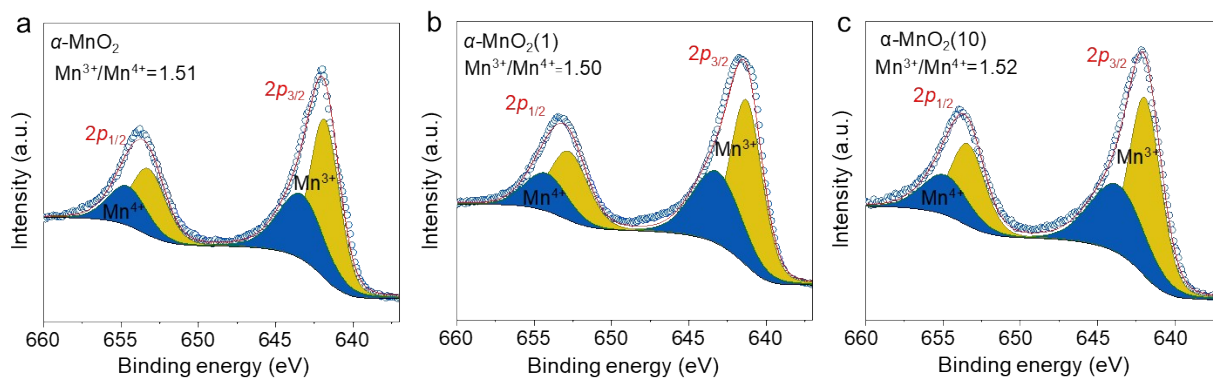

**Fig. S10.** Mn 2p XPS spectra of (a)  $\alpha$ -MnO<sub>2</sub>, (b)  $\alpha$ -MnO<sub>2</sub>(1), and (c)  $\alpha$ -MnO<sub>2</sub>(10) oxides.

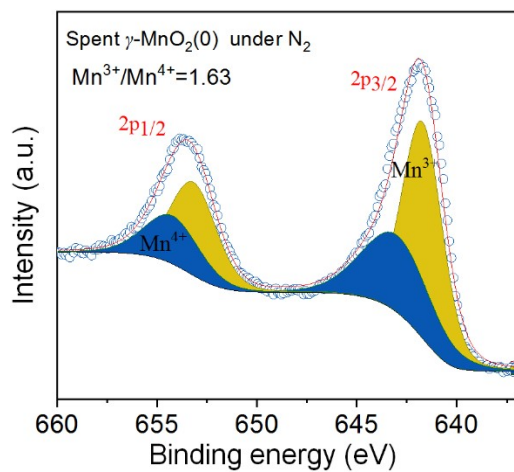

**Fig. S11.** Mn 2p XPS pattern of  $\gamma$ -MnO<sub>2</sub> used in the oxidation reaction of vanillyl alcohol under N<sub>2</sub> atmosphere.

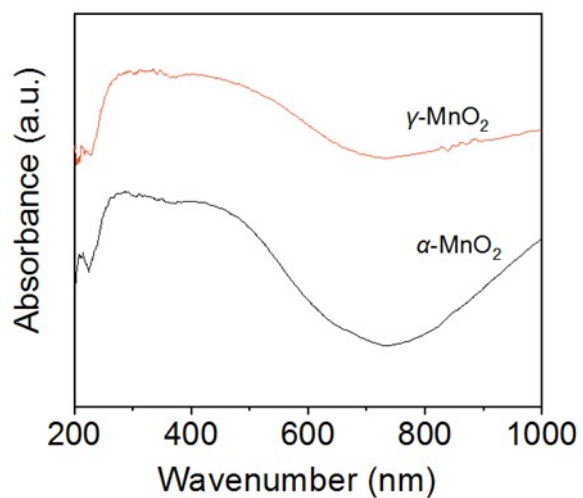

**Fig. S12.** UV-Vis-NIR DRS of the  $\alpha$ -MnO<sub>2</sub> and  $\gamma$ -MnO<sub>2</sub> oxides.

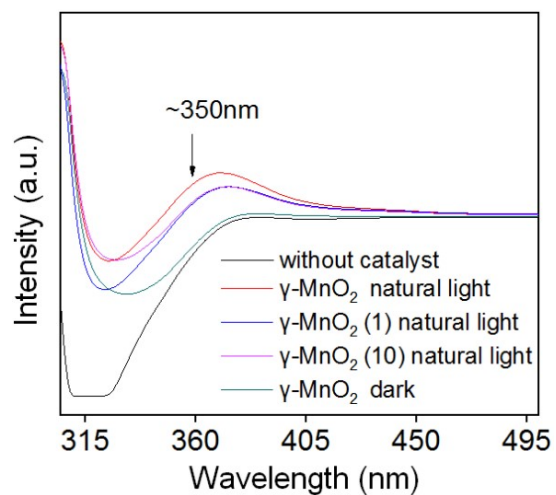

**Fig. S13.** Detection of  $\text{H}_2\text{O}_2$  species after oxidation of vanillyl alcohol over various catalysts for 10 min through the iodometry method.

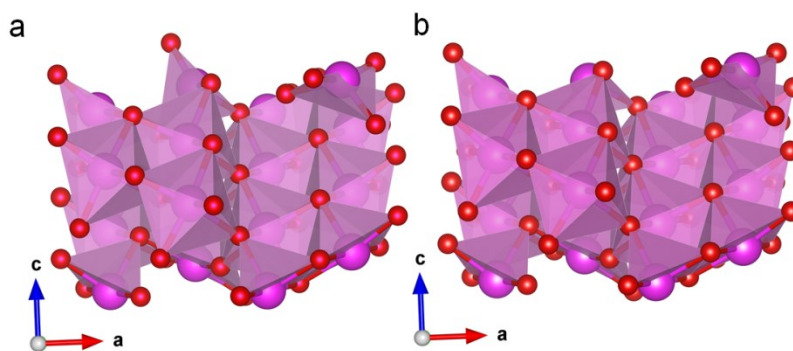

**Fig. S14.** (a) Perfect (120) facet and (b) defective (120) facet of  $\gamma\text{-MnO}_2$  catalyst.

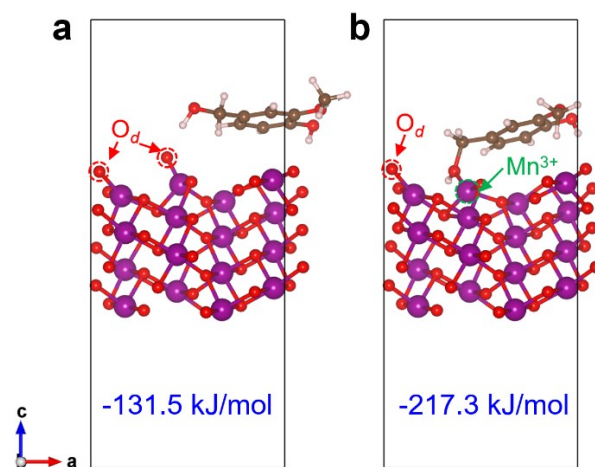

**Fig. S15.** DFT calculations for the adsorption energy of vanillyl alcohol on  $\gamma$ - $\text{MnO}_2$  without (a) and with (b) surface  $\text{Mn}^{3+}$  active sites.

**Table S1.** Comparison of the selected typical studies for the aerobic oxidation of vanillyl alcohol from the CHEM21 Green Metrics Toolkit calculation.

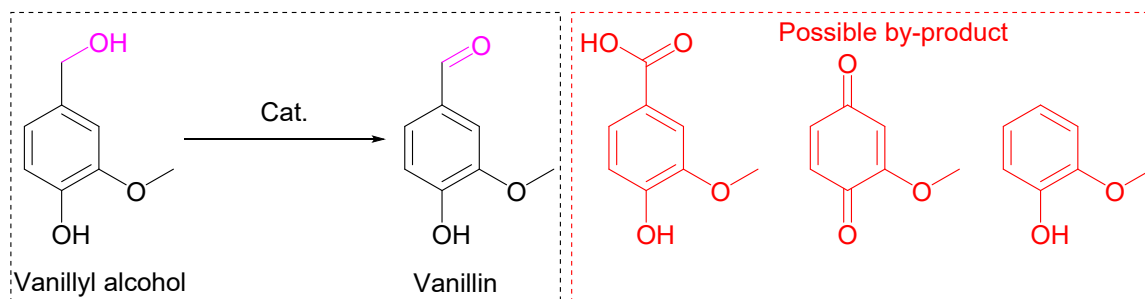

| Metric                        | our study | Ref. 1 <sup>[6]</sup> | Ref. 2 <sup>[7]</sup> | Ref. 3 <sup>[8]</sup> | Ref. 4 <sup>[9]</sup> | Ref. 5 <sup>[10]</sup> | Ref. 6 <sup>[11]</sup> | Ref. 7 <sup>[12]</sup>                                                                         |
|-------------------------------|-----------|-----------------------|-----------------------|-----------------------|-----------------------|------------------------|------------------------|------------------------------------------------------------------------------------------------|
| Solvent                       | W         | O/W                   | O                     | O                     | O                     | W                      | O                      | O/W                                                                                            |
| Energy                        | R.T.      | R.T.                  | 120                   | R.T.                  | R.T.                  | 80                     | 120                    | R.T.                                                                                           |
| Pressure                      | 1bar      | 1bar                  | 5bar                  | 1bar                  | 1bar                  | 1bar                   | 3bar                   | 1bar                                                                                           |
| work up                       | ✓         | ✓                     | ✓                     | —                     | ✓                     | ✗                      | ✓                      | ✓                                                                                              |
| Con. (%)                      | >89       | >89                   | >89                   | >89                   | <70                   | >89                    | >89                    | >89                                                                                            |
| Sel. (%)                      | >89       | >89                   | >89                   | <70                   | <70                   | >89                    | >89                    | >89                                                                                            |
| Additive                      | Free      | TEMP<br>O             | Free                  | Free                  | Free                  | Free                   | Free                   | Free                                                                                           |
| Catalyst<br>(toxic, economic) | Mn        | Cu                    | Pd                    | Ag                    | Au-Pd                 | Pd                     | AgPd                   | K <sub>4</sub> [Pt <sub>2</sub> (P <sub>2</sub> O <sub>5</sub> H <sub>2</sub> ) <sub>4</sub> ] |

**Table S2.** Effects of reaction temperatures for the aerobic oxidation of vanillyl alcohol over  $\gamma$ -MnO<sub>2</sub> catalyst.

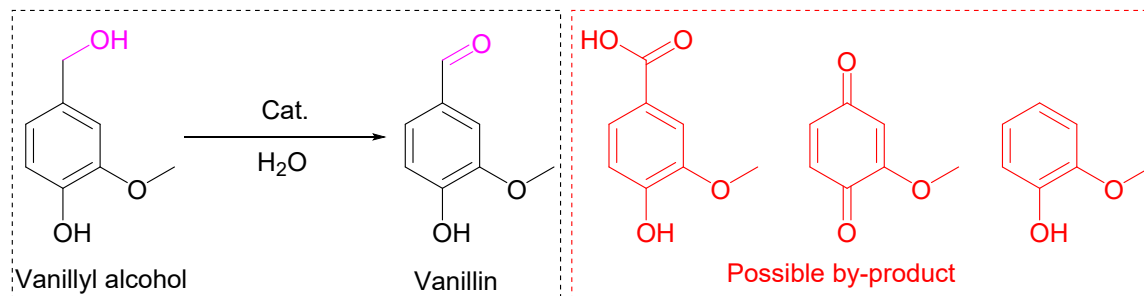

| Catalyst                   | Vanillyl alcohol (mmol) | Temp. (°C) | Con. % | Sel. % |
|----------------------------|-------------------------|------------|--------|--------|
| $\gamma$ -MnO <sub>2</sub> | 5                       | 20         | 60.0   | 87.6   |
|                            | 5                       | 25         | 69.1   | 88.7   |
|                            | 5                       | 30         | 93.4   | 95.7   |
|                            | 5                       | 35         | 82.0   | 88.8   |

**Table S3.** Effects of reaction solvents for the aerobic oxidation of vanillyl alcohol over  $\gamma$ -MnO<sub>2</sub> catalyst (T = 30 °C).

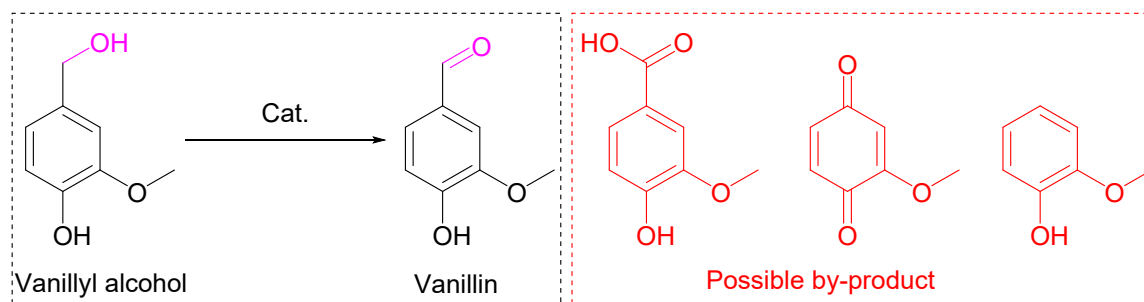

| Catalyst                   | Vanillyl alcohol (mmol) | Solvent          | Con. % | Sel. % |
|----------------------------|-------------------------|------------------|--------|--------|
| $\gamma$ -MnO <sub>2</sub> | 5                       | MeCN             | 43.4   | 63.8   |
|                            | 5                       | DMF              | 29.5   | 46.8   |
|                            | 5                       | Toluene          | 79.5   | 21.7   |
|                            | 5                       | MeOH             | 16.3   | 44.0   |
|                            | 5                       | 1,4-Dioxane      | 18.7   | 46.9   |
|                            | 5                       | H <sub>2</sub> O | 93.4   | 95.7   |

## Reference

1. G. Kresse and J. Furthmüller, *Comp. Mater. Sci.*, 1996, **6**, 15-50.
2. P. E. Blöchl, *Phys. Rev. B*, 1994, **50**, 17953.
3. M. Ernzerhof and J. P. Perdew, *J. Chem. Phys.*, 1998, **109**, 3313-3320.
4. S. Grimme, J. Antony, S. Ehrlich and H. Krieg, *J. Chem. Phys.*, 2010, **132**, 154104.
5. X. Li, J. Ma, C. Zhang, R. Zhang and H. He, *J. Environ. Sci.*, 2020, **91**, 43-53.
6. N. C. Jana, S. Sethi, R. Saha and B. Bagh, *Green Chem.*, 2022, **24**, 2542-2556.
7. W. Sun, S. Wu, Y. Lu, Y. Wang, Q. Cao and W. Fang, *ACS Catal.*, 2020, **10**, 7699-7709.
8. J. Estrada-Pomares, S. Ramos-Terrón, G. Lasarte-Aragonés, R. Lucena, S. Cárdenas, D. Rodríguez-Padrón, R. Luque and G. de Miguel, *J. Mater. Chem. A*, 2022, **10**, 11298-11305.
9. M. Wu, J.-H. Pang, P.-P. Song, J.-J. Peng, F. Xu, Q. Li and X.-M. Zhang, *New J. Chem.*, 2019, **43**, 1964-1971.
10. W. Fu, L. Yue, X. Duan, J. Li and G. Lu, *Green Chem.*, 2016, **18**, 6136-6142.
11. W. Sun, P. Lin, Q. Tang, F. Jing, Q. Cao and W. Fang, *Catal. Sci. Technol.*, 2021, **11**, 7268-7277.
12. J.-J. Zhong, W.-P. To, Y. Liu, W. Lu and C.-M. Che, *Chem. Sci.*, 2019, **10**, 4883-4889.
